# Supplementary material
Source: PubMed Central journal article supplement (PMC3165080)
Supplement: NIHMS315669-supplement-1_si_001.pdf [file NIHMS315669-supplement-1_si_001.pdf]

# High-Throughput Quantification of Bioactive Lipids by MALDI Mass Spectrometry: Application to Prostaglandins

Joseph D. Manna<sup>†</sup>, Michelle L. Rezyer<sup>†</sup>, Joey C. Latham<sup>†</sup>, C. David Weaver<sup>#</sup>, Lawrence J. Marnett<sup>†¶#</sup>, and Richard M. Caprioli<sup>†¶#</sup>

Departments of Biochemistry<sup>†</sup>, Chemistry<sup>‡</sup>, and Pharmacology<sup>#</sup>, Vanderbilt Institute of Chemical Biology, Mass Spectrometry Research Center, Center in Molecular Toxicology, Vanderbilt-Ingram Cancer Center, Vanderbilt University School of Medicine, Nashville TN 37232

## Supporting Information

**Supplemental Figure 1.** MALDI MS/MS for PGE<sub>2</sub> and PGE<sub>2</sub>-G. Derivatized PGE<sub>2</sub> and PGE<sub>2</sub>-G ions were subjected to collisionally activated dissociation in a linear ion trap in order to determine the optimal transitions for SRM analysis. The fragments chosen for MS<sup>2</sup> of PGE<sub>2</sub> and PGE<sub>2</sub>-G were m/z = 389.3 and 463.3 (indicated by ★), respectively. These signals were chosen because they were unique and gave the largest intensity which allowed for accurate quantification and good sensitivity. Full scan and MS<sup>2</sup> spectra for PGE<sub>2</sub>-d4 were also acquired (data not shown) and showed similar intensity and fragmentation as PGE<sub>2</sub>.
