# Supplementary material
Source: PubMed Central journal article supplement (PMC3165080)
Supplement: NIHMS315669-supplement-2_si_002.pdf [file NIHMS315669-supplement-2_si_002.pdf]

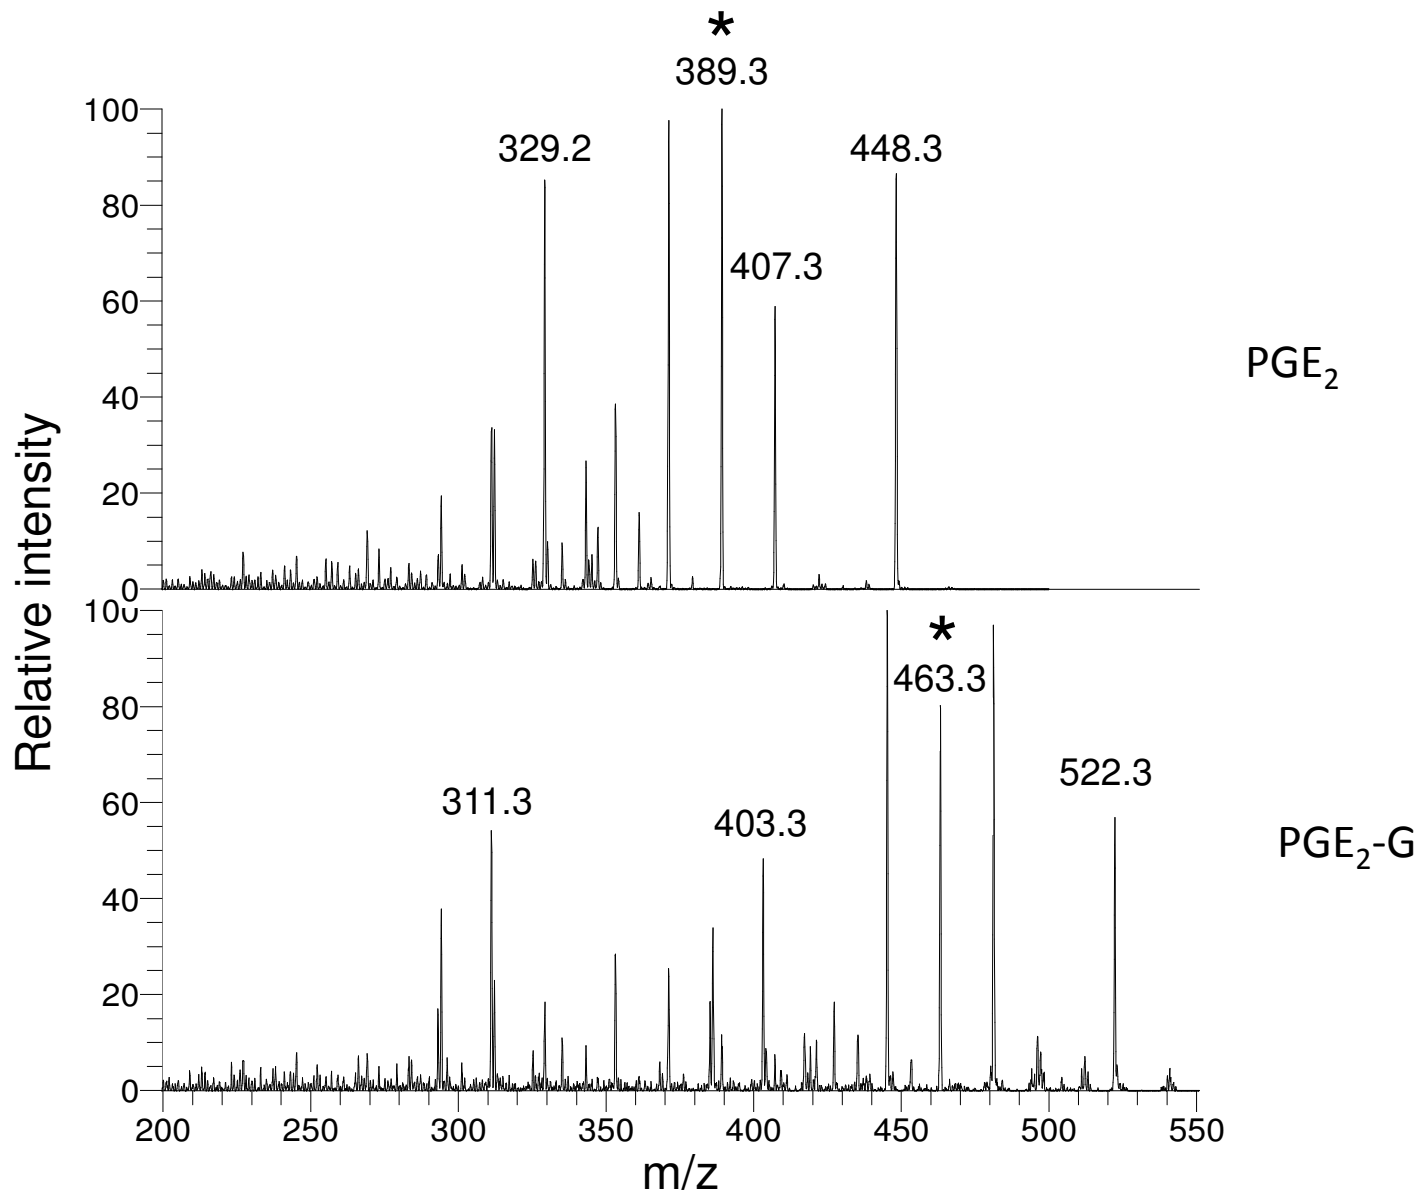

**Supplemental Figure 1.** MALDI MS/MS for PGE<sub>2</sub> and PGE<sub>2</sub>-G. Derivatized PGE<sub>2</sub> and PGE<sub>2</sub>-G ions were subjected to collisionally activated dissociation in a linear ion trap in order to determine the optimal transitions for SRM analysis. The fragments chosen for MS<sup>2</sup> of PGE<sub>2</sub> and PGE<sub>2</sub>-G were m/z = 389.3 and 463.3 (indicated by \*), respectively. These signals were chosen because they were unique and gave the largest intensity which allowed for accurate quantification and good sensitivity. Full scan and MS<sup>2</sup> spectra for PGE<sub>2</sub>-d<sub>4</sub> were also acquired (data not shown) and showed similar intensity and fragmentation as PGE<sub>2</sub>.
